# Supplementary material
Source: publisher site journal article supplement (https://www.spandidos-publications.com/740/downloadSupplementary)
Supplement: Supplementary file 1 [file downloadSupplementary]

Table SI. The detailed demographic of the patients with breast cancer.

|        | Total       | Female      | Male        | Unknown |
|--------|-------------|-------------|-------------|---------|
| Number | 825         | 810         | 8           | 7       |
| Age    | 58.04±13.21 | 57.99±13.21 | 63.12±13.53 | -       |
